# Supplementary material
Source: PubMed Central journal article supplement (PMC3679641)
Supplement: blood-2012-05-430470-1.pdf [file blood-2012-05-430470-1.pdf]

Harly et al.

**Supplemental data****Supplemental Materials and Methods**

**Expression of full-length, truncated and chimeric BTN3 proteins.** Full-length cDNAs for human BTN3A1 (LIFESEQ3294566), BTN3A2 (LIFESEQ6701037), and BTN3A3 (BC015815) were from Open Biosystems and subcloned in pEGFP-1 (Clontech), or pSP72 (Promega). 5'-phosphorylated oligonucleotides 5'-TCTGCTACTTTCAAGATGGTGACTTCTATGA-3' and 5'-GATATTTGCCACTGTCAGAGGCTGTGACGT-3' were used for PCR mutagenesis of the cDNAs to mutate the whole sequence targeted by shRNA#284 (mutation of 5'-GGAAAGTACTTGTGTTATTTTC-3' to 5'-GGCAAATATCTCTGCTACTTT-3'). Mutated cDNAs were subcloned in a modified pIRES1hyg (Clontech). Following hygromycin selection, stable transfectants were checked for the selective re-expression of mutated BTN3A1, BTN3A2 or BTN3A3 by flow cytometry. Carboxy-terminus EmGFP- or mCherry-tagged BTN3A1 and BTN3A2 molecules were obtained by subcloning full-length cDNAs in frame with the sequences encoding for the fluorescent tag from, respectively, the pcDNA6.2/C-EmGFP-GW/TOPO (Invitrogen) or the pmCherry-N1 (Clontech) vectors. When specified, helix-forming peptide linkers A(EAAAK)4A were introduced in frame to separate BTN3 and fluorescent domains.<sup>33</sup> Plasmids were used for transient or stable transfections in either CD277 kd HEK293FT cells (sh#284; clone#30) or wild-type HEK293 cells. For truncated BTN3A1 proteins lacking the B30.2 intracellular domain, the following oligonucleotides: 5'-ACCATGAAAATGGCAAGTTTCCTGGCC-3' and 5'-GATGGGGTTTGCTGTTTTTG-3' were used for PCR. Chimeric BTN3A3-BTN3A1 B30.2 proteins were generated by using the oligonucleotides 5'-CGCAGGCTTGAAGAGGGCCATTTTCCAT-3' and 5'-TGAAGAGGGCCATTTTCCATTCATGATAGGCCA-3'.

**Knockdown of BTN3 isoforms in HEK293FT cells.** Short hairpin RNA (shRNA) sequences (sh#240, sh#284) were designed for targeting fully conserved RNA sequences encoding for the extracellular region of BTN3A1, BTN3A2 and BTN3A3 isoforms. Oligonucleotides 5'-ACCGGAAGGCTGCTCTCCGAATACCGAAGTATTCGGAGAGCAGCCTTTCCTTTTTG-3', 5'-TCGACAAAAAGGAAGGCTGCTCTCCAA TACTTCGGTATTCGGAGAGCA

GCCTTC-3' (sh#240); 5'-ACCGGAAGTACTTGTGTT ATTTCCGAAGAAATAACAC

AAGTACTTTTCCTTTTTG-3, 5'-TCGACAAAAAGGAAA GACTTGTGTTATTTCTT

CGGAAATAACACAAGTACTTTTC-3' (sh#284); and irrelevant sequence (shControl) were annealed and cloned downstream from the human U6 snRNA gene promoter before introduction of the sequence-verified U6-shRNA cassette into the lentiviral vector FG12.<sup>34</sup> Lentiviral particles were produced by transient transfection of HEK293FT cells. Virus particles contained in cell supernatants were next concentrated by ultracentrifugation, titrated, and used to infect HEK293FT target cells at a multiplicity of infection of 10. The expression of CD277 in transduced cells was checked by flow cytometry and cells were sorted using a FACSAriaIII cell sorter (BD Biosciences), then cloned by limiting dilution.

**Cell division.** Carboxyfluorescein diacetate succinimidyl ester (CFSE) was from Invitrogen. Freshly isolated PBMCs ( $2 \times 10^6$  cells) were labeled with CFSE ( $1.5 \mu\text{M}$  in PBS) for 10 min at  $37^\circ\text{C}$ , washed and maintained for 15 min at  $37^\circ\text{C}$  in complete medium to allow the release of dye excess. Labeled cells were activated, in the presence of IL-2 (300 IU/ml). After 4 days, cells were harvested, stained for  $\gamma\delta$  TCR surface expression and analyzed by flow cytometry. Peaks of cell division and frequencies were calculated by using the FlowJo analysis software.

**Antibody-dependent cell cytotoxicity.** Anti-human CD20 mAb (Rituximab) and human  $\alpha\beta$  CD8<sup>pos</sup> T cells (CMVpp65/A2) expressing or not CD16 Fc $\gamma$ RIII lentiviral transduction, were kindly provided by B. Cl  menceau and H. Vi   (INSERM UMR892).

**Quantification of endogenous PAg.** The detection and quantification of endogenous IPP and Apppl was performed as described (Monkkonen et al., 2007).

## Microscopy

HEK293FT cells ( $1 \times 10^5$ ) expressing carboxy-terminus Emerald GFP (EmGFP)-tagged CD277 molecules were laid on BD Cell-Tak pre-coated slides (BD Biosciences). V $\gamma$ 9V $\delta$ 2 T cells ( $1 \times 10^5$ ) were added and left to conjugate to HEK293FT cells for 30 min at  $37^\circ\text{C}$ , pretreated or not with anti-CD277 mAb. After addition of primary anti-CD3 mAb (#OKT3,  $10 \mu\text{g/ml}$ ) and incubation for 10 min at  $37^\circ\text{C}$ , paraformaldehyde-fixed samples were stained with Alexa 568-labeled anti-mouse IgG2a ( $2 \mu\text{g/ml}$ ) for 10 min at  $37^\circ\text{C}$  and washed. The slides were mounted by using Fluoromount reagent (Southern Biotechnology) and analyzed using a Nikon A1 RS confocal microscope (60xNA 1.40 oil immersion objective). Images were analyzed with Metamorph 7.5 (Molecular Devices, Universal Imaging) and NIS (Nikon) imaging softwares. Measurement of the intracellular  $\text{Ca}^{2+}$  levels were performed within T cells loaded with  $1 \mu\text{M}$  Fura-2 AM (Molecular Probes) as described (Nedellec et al., 2010). For FRAP analysis, HEK293 cells expressing either EmGFP or mCherry-fused CD277 were laid on  $\mu$ -slides (Ibidi) and analyzed using a Nikon A1 RS confocal microscope (60xNA 1.40 oil immersion objective). Selected rectangular areas were photobleached for 500 ms by using full power of laser intensity (> 90% of loss of fluorescence). Images were collected every 5 s, before (30 s) and after (120 s) bleaching using low laser intensity. The resulting curves were fitted using one-phase exponential equations.

## Supplemental reference

Monkkonen H., Ottewell P.D., Kuokkanen J., Monkkonen J., Auriola S., Holen I. Zoledronic acid-induced IPP/Apppl production in vivo. *Life Sci.* 2007; 81(13):1066-1070.

Nedellec S, Sabourin C, Bonneville M, Scotet E. NKG2D costimulates human V $\gamma$ 9V $\delta$ 2 T cell antitumor cytotoxicity through protein kinase C $\theta$ -dependent modulation of early TCR-induced calcium and transduction signals. *J Immunol.* 2010;185(1):55-63.

## SUPPLEMENTAL FIGURES

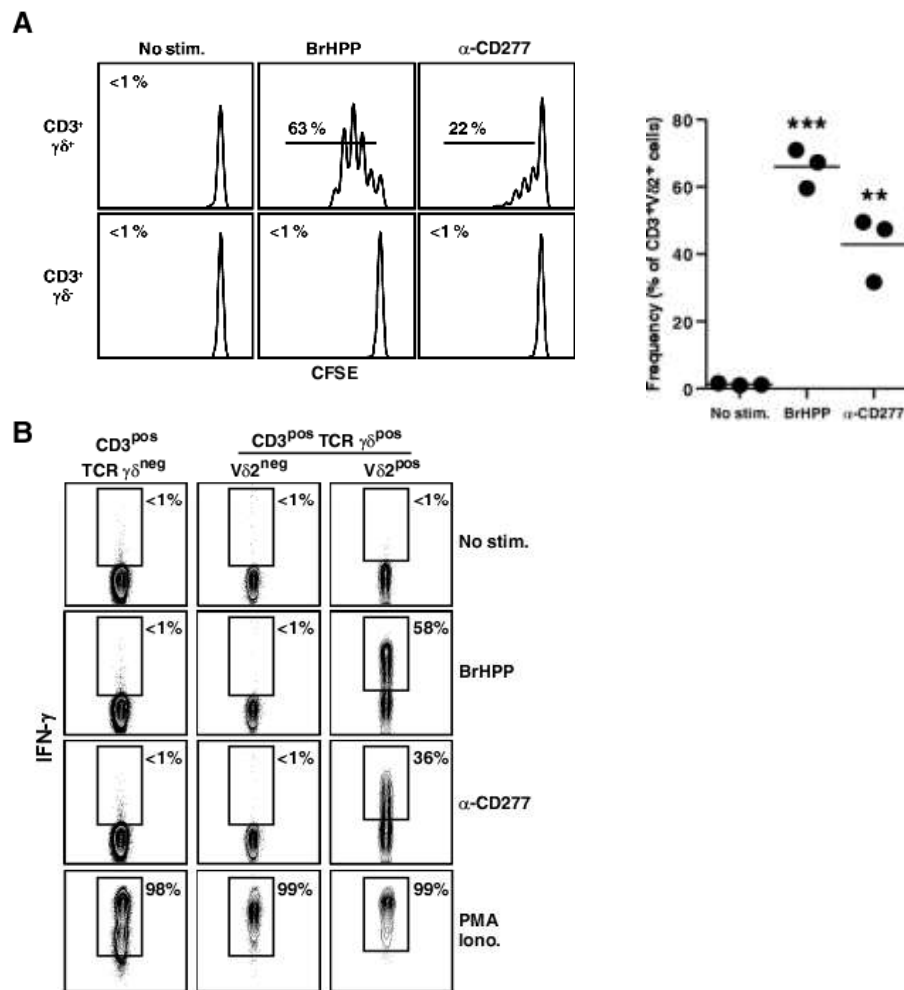

**Figure S1. Anti-CD277 mAbs induce activation of ex vivo human V $\gamma$ 9V $\delta$ 2 T cells.** (A) *Left*, CFSE dilution measured within fresh ex vivo human PBMC-CD3<sup>pos</sup> TCR  $\gamma\delta^{\text{pos}}$  or TCR  $\gamma\delta^{\text{neg}}$  T cell subsets at day 4 following an initial stimulation with either PAg (BrHPP; 3  $\mu$ M) or anti-CD277 mAb (#20.1; 10  $\mu$ g/ml) in the presence of recombinant human IL-2. The values for the percentage of divided T cells are indicated. *Right*, frequencies of CD3<sup>pos</sup>V $\delta$ 2<sup>pos</sup> cells within fresh human PBMCs (n=3 healthy donors) at day 10 following an initial stimulation with either PAg (BrHPP; 3  $\mu$ M) or anti-CD277 mAb (#20.1; 10  $\mu$ g/ml) in the presence of recombinant human IL-2. Bar, mean value; \*\* p < 0.005, \*\*\* p < 0.0005. (B) Intracellular staining of IFN- $\gamma$  in freshly isolated CD3<sup>pos</sup> PBL subsets after treatment for 5 h with anti-CD277 mAb (#20.1; 10  $\mu$ g/ml), soluble PAg (BrHPP; 3  $\mu$ M) or PMA and ionomycin (PMA/Iono.). Numbers adjacent to outlined areas indicate the percentage of IFN- $\gamma^{\text{pos}}$  T cells. The data presented in this panel are representative of independent experiments performed with PBL from distinct healthy donors (n>3).

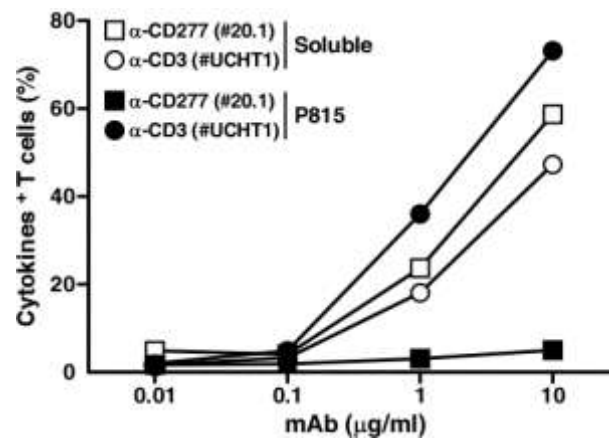

**Figure S2. Lack of  $V\gamma 9V\delta 2$  T cell activation by anti-CD277 mAbs, when immobilized on  $\text{FcRI}^{\text{pos}}$  murine P815 cells.** Cytokine response of human  $V\gamma 9V\delta 2$  T cells (clone GR4) was measured following coculture with murine P815 cells, loaded with grading doses of either anti-CD277 (#20.1, mouse IgG1) or anti-CD3 (#UCHT1, mouse IgG1) mAbs (filled symbols). Controls: no preloading of P815 cells, cocultures performed in the presence of soluble mAbs (open symbols). Intracellular stainings of  $\text{TNF-}\alpha$  and  $\text{IFN-}\gamma$  were performed and analyzed by flow cytometry. Data are presented in the graph as the percentage of  $\text{IFN-}\gamma^{\text{pos}}$  and  $\text{TNF-}\alpha^{\text{pos}}$   $\gamma\delta$  T cells and are representative of at least 3 independent experiments.

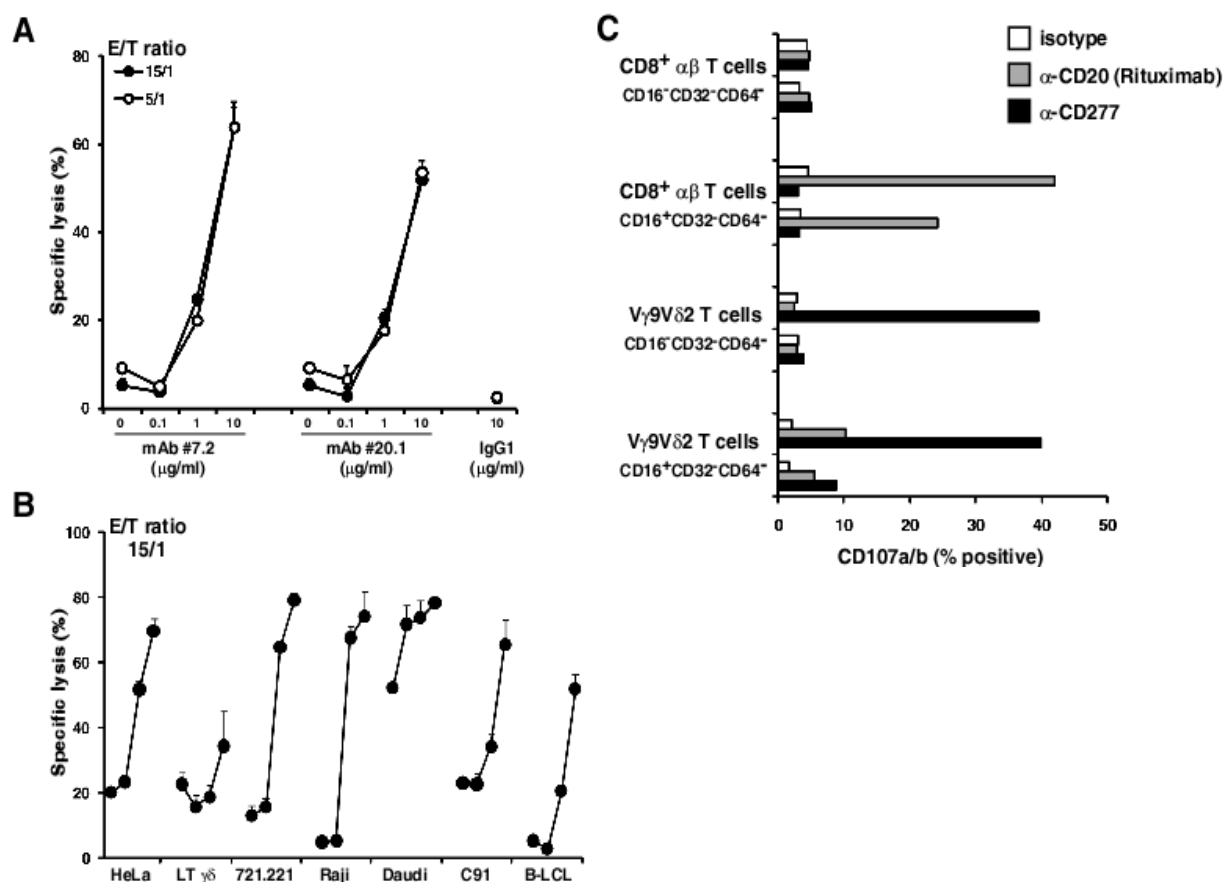

**Figure S3. Anti-CD277 mAbs trigger cytolytic activity of V $\gamma$ 9V $\delta$ 2 T cells against various human target cells.** (A) Cytolytic responses of human V $\gamma$ 9V $\delta$ 2 T cells (clone GR4) against Raji target cells (effector to target ratios: 15/1 and 5/1), pretreated for 2 h with grading doses of two clones of anti-CD277 mAbs (#7.2 and #20.1). IgG1, isotype control. (B) Cytolytic responses of V $\gamma$ 9V $\delta$ 2 T cells (clone GR4) against various human target cells (effector to target ratios: 15/1), pretreated for 2 h by grading doses (0, 0.1, 1 and 10  $\mu$ g/ml) of anti-CD277 mAb (#7.2). Data are presented as the mean value  $\pm$  s.d. of triplicate samples. (C) Expression of CD107a/b on human  $\alpha\beta$  CD8<sup>pos</sup> and V $\gamma$ 9V $\delta$ 2 T cells, expressing or not Fc $\gamma$ R molecules following coculture with human B-LCL (CD20<sup>pos</sup>CD277<sup>pos</sup>) pretreated for 2 h with either anti-CD20 (Rituximab) or anti-CD277 (#20.1) mAbs. The surface expression of CD16 (Fc $\gamma$ RIII), CD32 (Fc $\gamma$ RII) and CD64 (Fc $\gamma$ RI) molecules on effector  $\alpha\beta$  (pp65 CMV/HLA-A2-specific line  $\alpha\beta$  CD8<sup>pos</sup> T cell transduced, or not, for CD16 expression) and  $\gamma\delta$  (CD16<sup>neg</sup>, clone GR4; CD16<sup>pos</sup>, line GUI) T cells was checked by flow cytometry. The values for the percentage of CD107a/b<sup>pos</sup> T cells are indicated and each antibody was used at 0.3  $\mu$ g/ml and 10  $\mu$ g/ml.

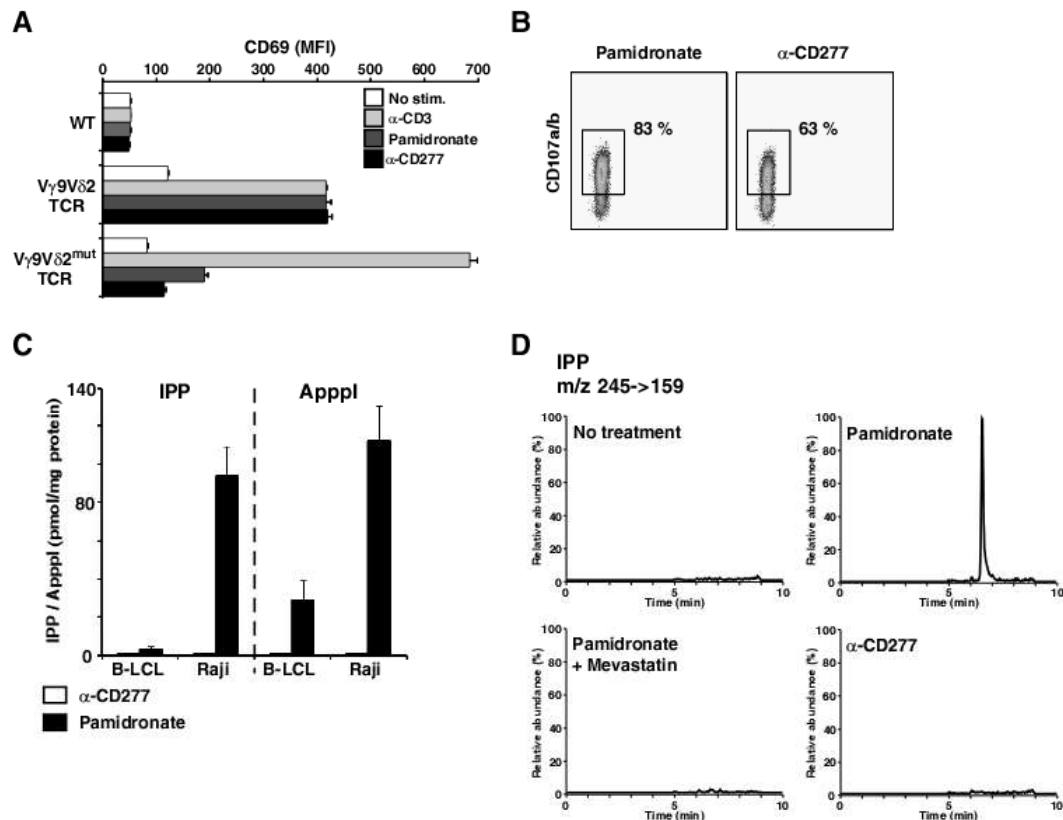

**Figure S4. Anti-CD277 mAbs trigger a TCR-mediated activation process similar to PAg but do not induce upregulation of PAg production and/or accumulation in target cells.** (A) Expression of CD69 on V $\gamma$ 9V $\delta$ 2 TCR Jurkat T cell transductants following coculture with B-LCL target cells (line 721.221), pretreated for 2 h with anti-CD277 mAb (#20.1; 10  $\mu$ g/ml) or NBP (Pamidronate, 250  $\mu$ M). WT, control Jurkat T cells without TCR; V $\gamma$ 9V $\delta$ 2 TCR, Jurkat T cells expressing a wild-type V $\gamma$ 9V $\delta$ 2 TCR, V $\gamma$ 9V $\delta$ 2<sup>mut</sup> TCR, Jurkat cells expressing a V $\gamma$ 9V $\delta$ 2 TCR carrying a mutation for the V $\delta$ 2 chain L97 residue. Anti-CD3 (#OKT3; 10  $\mu$ g/ml). Data are presented as the mean value of geometric mean of fluorescence intensity (MFI)  $\pm$  s.d. of triplicate samples and are representative of at least three independent experiments. (B) CD107a/b surface expression on V $\gamma$ 9V $\delta$ 2 T cells following coculture with Raji target cells pretreated for 2 h with either NBP (Pamidronate, 250  $\mu$ M) or anti-CD277 mAb (#20.1; 10  $\mu$ g/ml). The values for the percentage of CD107a/b<sup>pos</sup> T cells are indicated. (C) IPP and Apppl formation in human B-LCL or Raji cells treated overnight with NBP (Pamidronate, 250  $\mu$ M) or for 5 h with anti-CD277 mAb (#20.1; 10  $\mu$ g/ml). The molar amounts of IPP and Apppl were determined in cell extracts by using high performance liquid chromatography–electrospray tandem mass spectrometry (detection limit: 30 fmole). The molar amounts of IPP and Apppl in extracts prepared from untreated B-LCL or Raji cells were below the detection limit. Data are presented as the mean value  $\pm$  s.d. (n>3). (D) Selective reaction monitoring chromatograms of extracts from Raji cells: untreated (-), treated overnight with NBP (Pamidronate, 250  $\mu$ M), pretreated first with mevastatin (25  $\mu$ M) for 6 h and next incubated overnight with NBP (Pamidronate, 250  $\mu$ M), and treated for 5 h with anti-CD277 mAb (#20.1; 10  $\mu$ g/ml). The chromatograms are drawn on the same scale.

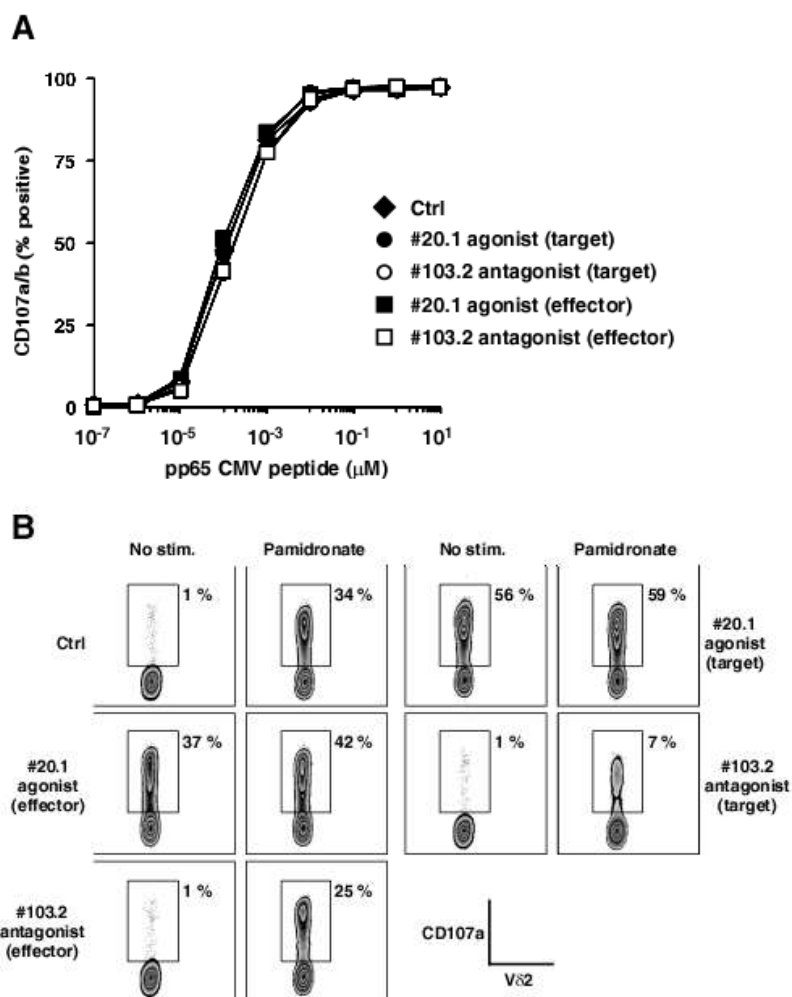

**Figure S5. Anti-CD277 mAbs do not affect activation of CD8<sup>pos</sup> αβ T cell clones by anti-CD3 mAb or a specific antigenic peptide.** (A) CD107a expression on human αβ CD8<sup>pos</sup> T cells (polyclonal line) following coculture with HLA-A2<sup>pos</sup> human B-LCL (line HEN) cells loaded with increasing concentrations of relevant peptide (CMVpp65/HLA-A2). (B) CD107a expression on human Vγ9Vδ2 T cells (line GUI) following coculture with Raji target cells, pretreated with NBP (Pamidronate, 100 µM). In both (A) and (B) experiments, effector T or target cells were treated, or not (Ctrl), with either agonist (#20.1; 10 µg/ml) or antagonist (#103.2; 10 µg/ml) anti-CD277 mAbs. The values for the percentage of CD107a<sup>pos</sup> Vδ2<sup>pos</sup> T cells are indicated. The data presented in this figure are representative of 3 independent experiments.

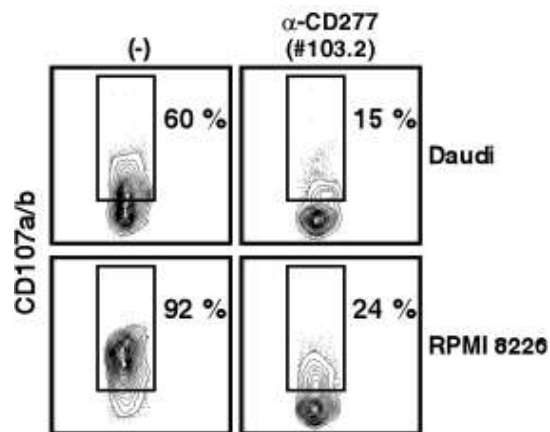

**Figure S6. CD277 plays a key role in V $\gamma$ 9V $\delta$ 2 T cell responses against susceptible tumor and infected human cells.** Expression of CD107a/b on V $\gamma$ 9V $\delta$ 2 T cells (clone GR4) following coculture with Daudi or RPMI 8226 tumor cells, in the presence or in the absence of #103.2 anti-CD277 mAb (10  $\mu$ g/ml). Numbers adjacent to outlined areas indicate the percentage of CD107a/b<sup>pos</sup>  $\gamma\delta$  T cells. The data presented in this figure are representative of >3 independent experiments performed with different human tumor cell lines.



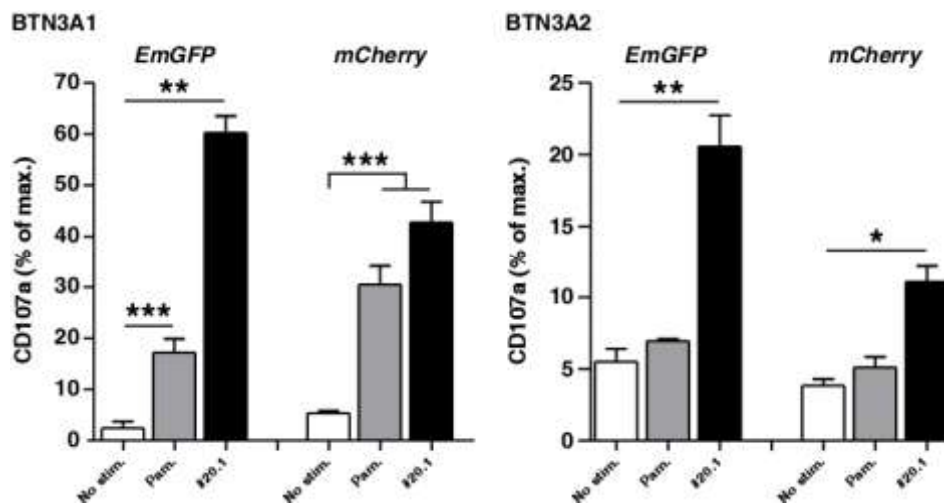

**Figure S7. Functionality of fluorescent BTN3A1 and BTN3A2 chimeras.** CD107a expression on human  $V\gamma 9V\delta 2$  T cells (polyclonal line) following coculture with shRNA#284 transduced-HEK293FT cells and transiently transfected for the expression of carboxyterminal EmGFP or mCherry-BTN3A1 (*left*) and -BTN3A2 (*right*) molecules. Cells were pretreated for 2 h with either anti-CD277 mAb (#20.1; 10  $\mu\text{g}/\text{ml}$ ) or NBP (Pam., Pamidronate, 250  $\mu\text{M}$ ). The values for the relative percentage of CD107a<sup>pos</sup>  $V\delta 2^{\text{pos}}$  T cells calculated by using the maximal response obtained, within each experimental test, by transfecting wild-type BTN3A1 molecules are indicated. \*  $p < 0.05$ , \*\*  $p < 0.005$  and \*\*\*\*  $p < 0.0005$  (Student's *t*-test).

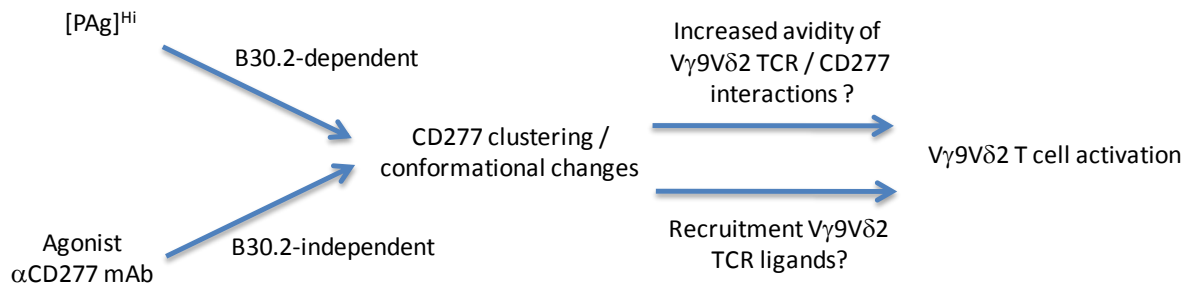

**Figure S8. An hypothetical model for CD277-dependent activation of V $\gamma$ 9V $\delta$ 2 T cells.** Activation of V $\gamma$ 9V $\delta$ 2 T cells requires prior conformational modification and/or clustering of CD277 molecules, that can be induced either by intracellular accumulation of PAg or by agonist anti-CD277 mAb. Generation of V $\gamma$ 9V $\delta$ 2 T cell-stimulating CD277 complexes by PAg requires the B30.2 domain of BTN3A1, whereas generation of such complexes by agonist anti-CD277 mAb is B30.2 domain-independent. The topological changes of CD277 could either increase the affinity or avidity of V $\gamma$ 9V $\delta$ 2 TCR/CD277 interactions, or recruit additional receptors (eg F1-ATPase) recognized by V $\gamma$ 9V $\delta$ 2 TCRs, resulting in both cases to V $\gamma$ 9V $\delta$ 2 T cell activation.
